# Supplementary material for: Performance of quantum chemistry methods for a benchmark set of spin-state energetics derived from experimental data of 17 transition metal complexes (SSE17)
Source: Chem Sci. 2024 Oct 28;15(48):20189–204. doi: 10.1039/d4sc05471g (PMC11577268; doi:10.1039/d4sc05471g)
Supplement: SC-015-D4SC05471G-s002 [file SC-015-D4SC05471G-s002.xlsx]

## Sheet: WFT energies
	method	HF	MP2	CCSD	CCSD(T)		CCSD(T#)-F12a	PBE0-CCSD(T)	PBE-CCSD(T)	FC-CCSD(T)	CASPT2	FC-CASPT2	FI-CASPT2	FI-MRCI+Q(RDC)	MRCI+Q(DSS)	MRCI+Q(PC)	MRCI+Q(RDC)	MRCI+Q(DC)	CASSCF(molcas)	CASSCF(molpro)
	basis	cT(D)-DK	cT(D)-DK	cT(D)-DK	cT(D)-DK	cT(D)	cT(D)	cT(D)-DK	cT(D)-DK	cT(D)-DK	cT(D)-DK	cT(D)-DK	cT(D)-DK	cT(D)-DK	cT(D)-DK	cT(D)-DK	cT(D)-DK	cT(D)-DK	cT(D)-DK	cT(D)-DK
complex	spinstate
A1	2	-2261.51	-2265.74	-2265.89	-2266.09	-2256.75	-2257.67	-2266.08	-2266.08	-2265.66	-2265.77	-2265.35	-2262.11	-2262.12	-2265.76	-2265.71	-2265.16	-2264.89	-2261.62	-2261.62
	6	-2261.65	-2265.76	-2265.92	-2266.1	-2256.76	-2257.68	-2266.09	-2266.08	-2265.68	-2265.78	-2265.36	-2262.16	-2262.16	-2265.78	-2265.72	-2265.18	-2264.92	-2261.69	-2261.69
A2	1	-2668.27	-2673.84	-2673.87	-2674.15	-2664.64	-2666	-2674.14	-2674.13	-2673.73	-2673.84	-2673.43	-2668.91	-2668.92	-2673.68	-2673.6	-2672.69	-2672.3	-2668.39	-2668.39
	5	-2668.39	-2673.84	-2673.89	-2674.15	-2664.64	-2665.99	-2674.13	-2674.12	-2673.73	-2673.84	-2673.42	-2668.97	-2668.97	-2673.68	-2673.6	-2672.72	-2672.33	-2668.46	-2668.46
A3	1	-2764.44	-2770.12	-2770.13	-2770.41	-2760.82	-2762.26	-2770.4	-2770.39	-2769.99	-2770.12	-2769.7	-2765.07	-2765.09	-2769.94	-2769.86	-2768.95	-2768.55	-2764.56	-2764.56
	5	-2764.55	-2770.13	-2770.15	-2770.41	-2760.82	-2762.26	-2770.39	-2770.38	-2769.99	-2770.13	-2769.7	-2765.13	-2765.13	-2769.94	-2769.87	-2768.97	-2768.58	-2764.62	-2764.62
A4	1	-2069.92	-2073.63	-2073.77	-2073.93	-2064.7	-2065.46	-2073.92	-2073.91	-2073.5	-2073.63	-2073.21	-2070.56	-2070.57	-2073.69	-2073.64	-2073.22	-2072.99	-2070.04	-2070.04
	5	-2070.03	-2073.64	-2073.79	-2073.93	-2064.7	-2065.45	-2073.92	-2073.91	-2073.51	-2073.64	-2073.22	-2070.61	-2070.61	-2073.7	-2073.65	-2073.23	-2073.01	-2070.1	-2070.1
A5	1	-2659.71	-2665.18	-2665.22	-2665.5	-2656	-2657.34	-2665.49	-2665.48	-2665.08	-2665.18	-2664.76	-2660.35	-2660.37	-2665.03	-2664.95	-2664.08	-2663.7	-2659.84	-2659.84
	5	-2659.84	-2665.19	-2665.24	-2665.5	-2656.01	-2657.33	-2665.49	-2665.47	-2665.08	-2665.19	-2664.77	-2660.42	-2660.42	-2665.04	-2664.96	-2664.1	-2663.73	-2659.91	-2659.91
A6	1	-2346.38	-2350.9	-2350.89	-2351.15	-2341.81	-2342.86	-2351.14	-2351.14	-2350.73	-2350.92	-2350.5	-2347.06	-2347.07	-2350.77	-2350.7	-2350.09	-2349.8	-2346.52	-2346.52
	5	-2346.5	-2350.93	-2350.92	-2351.16	-2341.82	-2342.86	-2351.15	-2351.14	-2350.74	-2350.93	-2350.5	-2347.1	-2347.1	-2350.78	-2350.72	-2350.12	-2349.83	-2346.58	-2346.58
A7	2	-2413.16	-2417.55	-2417.63	-2417.85	-2406.96	-2407.93	-2417.84	-2417.83	-2417.42	-2417.54	-2417.11	-2413.86	-2413.87	-2417.48	-2417.42	-2416.86	-2416.58	-2413.3	-2413.3
	4	-2413.24	-2417.56	-2417.65	-2417.85	-2406.97	-2407.93	-2417.84	-2417.83	-2417.42	-2417.55	-2417.12	-2413.89	-2413.9	-2417.49	-2417.43	-2416.88	-2416.6	-2413.34	-2413.34
A8	1	-2250.08	-2253.7	-2253.75	-2253.92	-2241.4	-2242.08	-2253.91	-2253.91	-2253.49	-2253.68	-2253.24	-2250.94	-2250.65	-2253.67	-2253.62	-2253.29	-2253.11	-2250.32	-2250.32
	3	-2250.15	-2253.7	-2253.76	-2253.91	-2241.39	-2242.07	-2253.91	-2253.9	-2253.49	-2253.67	-2253.24	-2250.95	-2250.65	-2253.66	-2253.62	-2253.29	-2253.11	-2250.34	-2250.34
A9	2	-1541.95	-1544.29	-1544.28	-1544.42	-1536.76	-1537	-1544.41	-1544.41	-1544	-1544.3	-1543.88	-1542.6	-1542.61	-1544.3	-1544.26	-1544.13	-1544.03	-1542.1	-1542.1
	6	-1542.12	-1544.29	-1544.31	-1544.42	-1536.77	-1537	-1544.41	-1544.41	-1544.01	-1544.3	-1543.89	-1542.65	-1542.64	-1544.3	-1544.27	-1544.14	-1544.05	-1542.17	-1542.17
B1	2	-1816.2	-1818.85	-1818.83	-1818.98	-1818.98	-1819.45	-1818.97	-1818.97	-1818.55	-1828.03	-1827.6	-1826.02	-1825.73	-1827.96	-1827.92	-1827.74	-1827.63	-1825.51	-1825.51
	4	-1816.17	-1818.76	-1818.75	-1818.89	-1818.89	-1819.36	-1818.88	-1818.88	-1818.46	-1827.94	-1827.51	-1825.94	-1825.64	-1827.87	-1827.83	-1827.66	-1827.54	-1825.44	-1825.44
B2	1	-1824.96	-1827.68	-1827.63	-1827.79	-1818.64	-1819.14	-1827.79	-1827.79	-1827.36	-1827.69	-1827.26	-1825.69	-1825.41	-1827.61	-1827.58	-1827.4	-1827.28	-1825.16	-1825.16
	3	-1824.89	-1827.56	-1827.53	-1827.67	-1818.52	-1819.02	-1827.67	-1827.67	-1827.24	-1827.57	-1827.14	-1825.58	-1825.29	-1827.5	-1827.46	-1827.28	-1827.17	-1825.04	-1825.04
B3	1	-1959.19	-1962.14	-1962.23	-1962.36	-1951.65	-1952.18	-1962.36	-1962.35	-1961.93	-1962.15	-1961.73	-1959.89	-1959.9	-1962.2	-1962.16	-1961.93	-1961.79	-1959.35	-1959.35
	3	-1959.16	-1962.07	-1962.17	-1962.29	-1951.58	-1952.11	-1962.29	-1962.28	-1961.86	-1962.09	-1961.66	-1959.83	-1959.83	-1962.13	-1962.09	-1961.87	-1961.73	-1959.29	-1959.29
B4	1	-2422.1	-2426.31	-2426.42	-2426.62	-2415.64	-2416.55	-2426.61	-2426.6	-2426.19	-2426.33	-2425.91	-2422.55	-2422.77	-2426.28	-2426.23	-2425.75	-2425.5	-2422.24	-2422.24
	3	-2422.08	-2426.27	-2426.38	-2426.57	-2415.59	-2416.51	-2426.56	-2426.56	-2426.14	-2426.29	-2425.87	-2422.51	-2422.73	-2426.23	-2426.18	-2425.71	-2425.46	-2422.2	-2422.2
C1	4	-2301.6	-2305.67	-2305.81	-2305.99	-2296.57	-2297.47	-2305.98	-2305.97	-2305.56	-2305.7	-2305.28	-2302.16	-2302.16	-2305.66	-2305.61	-2305.13	-2304.88	-2301.68	-2301.68
	6	-2301.72	-2305.75	-2305.87	-2306.04	-2296.62	-2297.52	-2306.03	-2306.02	-2305.62	-2305.76	-2305.35	-2302.23	-2302.23	-2305.72	-2305.67	-2305.2	-2304.95	-2301.77	-2301.77
C2	4	-2397.9	-2401.78	-2401.78	-2401.95	-2392.35	-2393.34	-2401.94	-2401.94	-2401.52	-2401.81	-2401.39	-2398.45	-2398.46	-2401.69	-2401.64	-2401.28	-2401.08	-2397.97	-2397.97
	6	-2398.02	-2401.86	-2401.85	-2402	-2392.41	-2393.39	-2402	-2401.99	-2401.59	-2401.88	-2401.46	-2398.53	-2398.53	-2401.75	-2401.7	-2401.35	-2401.15	-2398.06	-2398.06
C3	4	-1725.2	-1727.92	-1728.04	-1728.14	-1720.38	-1720.88	-1728.14	-1728.13	-1727.73	-1727.93	-1727.52	-1725.73	-1725.74	-1728.01	-1727.97	-1727.74	-1727.6	-1725.26	-1725.26
	6	-1725.31	-1728	-1728.12	-1728.22	-1720.45	-1720.95	-1728.21	-1728.2	-1727.81	-1728.01	-1727.6	-1725.82	-1725.82	-1728.08	-1728.05	-1727.82	-1727.68	-1725.36	-1725.36
C4	3	-1727.53	-1729.69	-1729.71	-1729.78	-1720.59	-1720.89	-1729.78	-1729.77	-1729.36	-1729.69	-1729.27	-1728.13	-1727.86	-1729.71	-1729.69	-1729.61	-1729.54	-1727.62	-1727.62
	5	-1727.62	-1729.76	-1729.78	-1729.84	-1720.65	-1720.95	-1729.84	-1729.83	-1729.42	-1729.76	-1729.34	-1728.19	-1727.92	-1729.77	-1729.75	-1729.67	-1729.6	-1727.69	-1727.69

## Sheet: DFT energies
	method	B3LYP-D3(BJ)	B3LYP*-D3(BJ)	M06-D3	M06L-D3	OLYP-D3(BJ)	OPBE-D3(BJ)	S12g	S12h	MVS	MVSh	SSB-D	PBE-D3(BJ)	PBE0-D3(BJ)	B97-D3	MN15	MN15L	TPSS-D3(BJ)	TPSSh-D3(BJ)	TPSSh-D4	PW6B95-D3(BJ)	CAM-B3LYP-D3(BJ)	LC-$\omega$PBE-D3(BJ)	$\omega$B97X-D	$\omega$B97X-V	$\omega$B97M-V	LH14t-calPBE-D3	LH20t-D4	SCAN-D3(BJ)	r2SCAN-D3(BJ)	B2PLYP-D3(BJ)	DSD-PBEP86-D3(BJ)	DSD-PBEB95-D3(BJ)	PWPB95-D3(BJ)	PWPB95-D4
	basis	def2-QZVPP	def2-QZVPP	def2-QZVPP	def2-QZVPP	def2-QZVPP	def2-QZVPP	def2-QZVPP	def2-QZVPP	def2-QZVPP	def2-QZVPP	def2-QZVPP	def2-QZVPP	def2-QZVPP	def2-QZVPP	def2-QZVPP	def2-QZVPP	def2-QZVPP	def2-QZVPP	def2-QZVPP	def2-QZVPP	def2-QZVPP	def2-QZVPP	def2-QZVPP	def2-QZVPP	def2-QZVPP	def2-QZVPP	def2-QZVPP	def2-QZVPP	def2-QZVPP	def2-QZVPP	def2-QZVPP	def2-QZVPP	def2-QZVPP	def2-QZVPP
complex	spinstate
A1	2	-2260.28	-2259.48	-2259.4	-2259.98	-2260.31	-2260.25	-2260.25	-2260.03	-2259.59	-2259.48	-2271.91	-2258.74	-2258.79	-2260	-2259.62	-2259.51	-2260.45	-2260.3	-2260.31	-2262.1	-2259.75	-2259.36	-2259.84	-2259.38	-2259.33	-2257.59	-2258.06	-2259.9	-2259.6	-2259.24	-2257.98	-2258.17	-2259.46	-2259.48
	6	-2260.28	-2259.48	-2259.44	-2260	-2260.31	-2260.25	-2260.25	-2260.05	-2259.61	-2259.53	-2271.92	-2258.71	-2258.8	-2260.02	-2259.61	-2259.57	-2260.42	-2260.28	-2260.29	-2262.11	-2259.76	-2259.35	-2259.84	-2259.38	-2259.32	-2257.59	-2258.05	-2259.89	-2259.6	-2259.24	-2257.99	-2258.18	-2259.46	-2259.47
A2	1	-2669.45	-2668.41	-2668.3	-2669.09	-2669.43	-2669.3	-2669.44	-2669.15	-2668.52	-2668.35	-2684.8	-2667.47	-2667.5	-2668.85	-2668.58	-2668.61	-2669.71	-2669.5	-2669.52	-2671.84	-2668.73	-2668.2	-2668.84	-2668.35	-2668.37	-2665.97	-2666.62	-2668.9	-2668.55	-2668.15	-2666.48	-2666.75	-2668.4	-2668.43
	5	-2669.44	-2668.39	-2668.31	-2669.07	-2669.41	-2669.28	-2669.43	-2669.17	-2668.51	-2668.38	-2684.79	-2667.43	-2667.5	-2668.84	-2668.57	-2668.63	-2669.67	-2669.48	-2669.49	-2671.83	-2668.73	-2668.19	-2668.83	-2668.34	-2668.35	-2665.96	-2666.6	-2668.85	-2668.53	-2668.14	-2666.49	-2666.75	-2668.4	-2668.42
A3	1	-2765.77	-2764.72	-2764.64	-2765.43	-2765.76	-2765.57	-2765.78	-2765.45	-2764.81	-2764.62	-2781.59	-2763.78	-2763.77	-2765.14	-2764.9	-2764.91	-2766.06	-2765.83	-2765.85	-2768.27	-2765.09	-2764.5	-2765.15	-2764.67	-2764.75	-2762.16	-2762.91	-2765.23	-2764.87	-2764.48	-2762.75	-2763.04	-2764.74	-2764.76
	5	-2765.77	-2764.7	-2764.65	-2765.41	-2765.74	-2765.55	-2765.77	-2765.47	-2764.8	-2764.64	-2781.59	-2763.74	-2763.77	-2765.13	-2764.9	-2764.94	-2766.02	-2765.81	-2765.82	-2768.27	-2765.09	-2764.49	-2765.15	-2764.66	-2764.74	-2762.16	-2762.9	-2765.19	-2764.85	-2764.48	-2762.76	-2763.04	-2764.73	-2764.76
A4	1	-2067.67	-2066.98	-2066.92	-2067.39	-2067.74	-2067.75	-2067.64	-2067.47	-2067.08	-2067.03	-2077.71	-2066.33	-2066.41	-2067.52	-2067.15	-2066.98	-2067.81	-2067.69	-2067.69	-2069.27	-2067.24	-2066.94	-2067.34	-2066.92	-2066.84	-2065.35	-2065.75	-2067.36	-2067.08	-2066.76	-2065.71	-2065.88	-2066.99	-2067
	5	-2067.68	-2066.97	-2066.94	-2067.39	-2067.74	-2067.74	-2067.64	-2067.5	-2067.09	-2067.06	-2077.71	-2066.31	-2066.42	-2067.53	-2067.14	-2067	-2067.78	-2067.67	-2067.67	-2069.27	-2067.24	-2066.93	-2067.34	-2066.91	-2066.83	-2065.35	-2065.74	-2067.33	-2067.07	-2066.77	-2065.72	-2065.88	-2066.98	-2067
A5	1	-2660.78	-2659.75	-2659.61	-2660.43	-2660.81	-2660.68	-2660.81	-2660.5	-2659.84	-2659.67	-2676.14	-2658.84	-2658.85	-2660.19	-2659.89	-2659.96	-2661.05	-2660.84	-2660.85	-2663.16	-2660.06	-2659.51	-2660.16	-2659.68	-2659.7	-2657.29	-2657.96	-2660.24	-2659.9	-2659.48	-2657.81	-2658.09	-2659.74	-2659.76
	5	-2660.78	-2659.74	-2659.63	-2660.43	-2660.8	-2660.66	-2660.8	-2660.52	-2659.84	-2659.71	-2676.14	-2658.8	-2658.86	-2660.19	-2659.89	-2659.99	-2661.01	-2660.82	-2660.83	-2663.17	-2660.06	-2659.51	-2660.16	-2659.67	-2659.7	-2657.29	-2657.95	-2660.21	-2659.89	-2659.48	-2657.82	-2658.09	-2659.74	-2659.76
A6	1	-2345.72	-2344.88	-2344.76	-2345.42	-2345.8	-2345.69	-2345.77	-2345.48	-2344.96	-2344.8	-2358.49	-2344.15	-2344.13	-2345.36	-2345.03	-2345.11	-2345.94	-2345.76	-2345.77	-2347.72	-2345.12	-2344.6	-2345.19	-2344.76	-2344.8	-2342.81	-2343.4	-2345.32	-2345.02	-2344.65	-2343.26	-2343.49	-2344.87	-2344.89
	5	-2345.72	-2344.86	-2344.78	-2345.42	-2345.78	-2345.67	-2345.75	-2345.5	-2344.97	-2344.85	-2358.48	-2344.11	-2344.15	-2345.34	-2345.03	-2345.15	-2345.9	-2345.74	-2345.75	-2347.73	-2345.13	-2344.6	-2345.19	-2344.76	-2344.8	-2342.81	-2343.39	-2345.29	-2345.01	-2344.65	-2343.28	-2343.5	-2344.88	-2344.89
A7	2	-2410.67	-2409.84	-2409.74	-2410.36	-2410.77	-2410.69	-2410.68	-2410.42	-2409.92	-2409.8	-2422.98	-2409.09	-2409.12	-2410.44	-2410.02	-2409.97	-2410.85	-2410.69	-2410.69	-2412.61	-2410.11	-2409.64	-2410.19	-2409.73	-2409.71	-2407.83	-2408.37	-2410.26	-2409.96	-2409.6	-2408.27	-2408.49	-2409.83	-2409.85
	4	-2410.67	-2409.83	-2409.74	-2410.35	-2410.75	-2410.66	-2410.66	-2410.43	-2409.91	-2409.82	-2422.97	-2409.06	-2409.12	-2410.42	-2410.01	-2409.97	-2410.83	-2410.68	-2410.68	-2412.61	-2410.11	-2409.64	-2410.2	-2409.73	-2409.71	-2407.83	-2408.37	-2410.24	-2409.95	-2409.6	-2408.28	-2408.49	-2409.83	-2409.85
A8	1	-2244.2	-2243.54	-2243.51	-2243.95	-2244.38	-2244.36	-2244.25	-2244	-2243.67	-2243.57	-2254.05	-2242.95	-2242.99	-2244.28	-2243.83	-2243.65	-2244.31	-2244.19	-2244.2	-2245.82	-2243.81	-2243.44	-2243.88	-2243.44	-2243.39	-2241.93	-2242.4	-2243.93	-2243.67	-2243.35	-2242.3	-2242.48	-2243.58	-2243.59
	3	-2244.2	-2243.54	-2243.51	-2243.95	-2244.38	-2244.35	-2244.25	-2244.01	-2243.67	-2243.59	-2254.05	-2242.95	-2243	-2244.28	-2243.82	-2243.64	-2244.3	-2244.19	-2244.19	-2245.83	-2243.81	-2243.43	-2243.88	-2243.44	-2243.4	-2241.93	-2242.4	-2243.93	-2243.66	-2243.34	-2242.3	-2242.49	-2243.58	-2243.59
A9	2	-1538.34	-1537.92	-1537.93	-1538.22	-1538.49	-1538.48	-1538.42	-1538.25	-1538.05	-1537.98	-1544.78	-1537.6	-1537.62	-1538.41	-1538.16	-1538.09	-1538.47	-1538.39	-1538.39	-1539.48	-1538.13	-1537.85	-1538.17	-1537.88	-1537.9	-1536.86	-1537.25	-1538.25	-1538.06	-1537.82	-1537.15	-1537.29	-1538.01	-1538.02
	6	-1538.35	-1537.92	-1537.96	-1538.21	-1538.49	-1538.47	-1538.4	-1538.27	-1538.06	-1538.03	-1544.76	-1537.56	-1537.63	-1538.42	-1538.16	-1538.12	-1538.43	-1538.37	-1538.37	-1539.49	-1538.14	-1537.85	-1538.16	-1537.87	-1537.9	-1536.86	-1537.24	-1538.23	-1538.05	-1537.82	-1537.15	-1537.29	-1538.01	-1538.01
B1	2	-1821.1	-1820.61	-1820.61	-1820.91	-1821.23	-1821.07	-1821.05	-1820.82	-1820.6	-1820.46	-1828.68	-1820.2	-1820.14	-1821.15	-1820.85	-1820.74	-1821.22	-1821.09	-1821.1	-1822.43	-1820.86	-1820.43	-1820.83	-1820.52	-1820.64	-1819.25	-1819.78	-1820.94	-1820.73	-1820.53	-1819.67	-1819.84	-1820.69	-1820.7
	4	-1821.01	-1820.52	-1820.53	-1820.81	-1821.13	-1820.97	-1820.95	-1820.74	-1820.52	-1820.4	-1828.59	-1820.1	-1820.05	-1821.06	-1820.77	-1820.66	-1821.12	-1821	-1821	-1822.35	-1820.78	-1820.34	-1820.74	-1820.43	-1820.55	-1819.16	-1819.69	-1820.84	-1820.63	-1820.43	-1819.58	-1819.75	-1820.6	-1820.61
B2	1	-1820.79	-1820.31	-1820.3	-1820.6	-1820.92	-1820.77	-1820.82	-1820.57	-1820.36	-1820.2	-1828.46	-1819.91	-1819.83	-1820.85	-1820.55	-1820.44	-1820.92	-1820.79	-1820.8	-1822.12	-1820.56	-1820.13	-1820.52	-1820.21	-1820.33	-1818.96	-1819.48	-1820.64	-1820.43	-1820.23	-1819.37	-1819.53	-1820.39	-1820.4
	3	-1820.69	-1820.2	-1820.19	-1820.48	-1820.81	-1820.65	-1820.71	-1820.47	-1820.25	-1820.11	-1828.34	-1819.79	-1819.72	-1820.73	-1820.45	-1820.33	-1820.8	-1820.67	-1820.68	-1822.02	-1820.45	-1820.01	-1820.41	-1820.1	-1820.23	-1818.84	-1819.36	-1820.52	-1820.31	-1820.11	-1819.25	-1819.42	-1820.28	-1820.28
B3	1	-1953.9	-1953.36	-1953.33	-1953.68	-1954.09	-1954.08	-1953.92	-1953.71	-1953.48	-1953.4	-1961.91	-1952.88	-1952.91	-1954.04	-1953.58	-1953.34	-1953.99	-1953.9	-1953.89	-1955.24	-1953.61	-1953.3	-1953.66	-1953.26	-1953.22	-1952	-1952.4	-1953.72	-1953.48	-1953.2	-1952.35	-1952.5	-1953.4	-1953.41
	3	-1953.83	-1953.29	-1953.28	-1953.6	-1954.01	-1954.01	-1953.84	-1953.66	-1953.42	-1953.36	-1961.84	-1952.8	-1952.85	-1953.97	-1953.53	-1953.28	-1953.92	-1953.82	-1953.82	-1955.18	-1953.55	-1953.24	-1953.59	-1953.19	-1953.15	-1951.93	-1952.33	-1953.65	-1953.4	-1953.13	-1952.28	-1952.43	-1953.33	-1953.34
B4	1	-2419.15	-2418.36	-2418.32	-2418.87	-2419.21	-2419.06	-2419.12	-2418.85	-2418.45	-2418.31	-2430.85	-2417.63	-2417.63	-2418.97	-2418.55	-2418.39	-2419.31	-2419.14	-2419.15	-2421.04	-2418.67	-2418.18	-2418.7	-2418.22	-2418.23	-2416.4	-2416.97	-2418.81	-2418.5	-2418.14	-2416.84	-2417.05	-2418.36	-2418.37
	3	-2419.11	-2418.31	-2418.28	-2418.82	-2419.16	-2419.02	-2419.07	-2418.82	-2418.42	-2418.28	-2430.81	-2417.57	-2417.59	-2418.92	-2418.52	-2418.36	-2419.26	-2419.09	-2419.1	-2421	-2418.63	-2418.14	-2418.66	-2418.18	-2418.18	-2416.35	-2416.92	-2418.76	-2418.45	-2418.09	-2416.8	-2417.01	-2418.31	-2418.33
C1	4	-2300.07	-2299.28	-2299.25	-2299.79	-2300.07	-2299.92	-2300.02	-2299.79	-2299.37	-2299.24	-2311.6	-2298.54	-2298.56	-2299.81	-2299.43	-2299.33	-2300.21	-2300.06	-2300.06	-2301.91	-2299.58	-2299.1	-2299.61	-2299.14	-2299.15	-2297.35	-2297.89	-2299.7	-2299.4	-2299.05	-2297.77	-2297.98	-2299.26	-2299.28
	6	-2300.1	-2299.3	-2299.3	-2299.83	-2300.1	-2299.95	-2300.04	-2299.83	-2299.42	-2299.32	-2311.63	-2298.55	-2298.6	-2299.83	-2299.46	-2299.39	-2300.23	-2300.08	-2300.09	-2301.95	-2299.61	-2299.13	-2299.65	-2299.18	-2299.18	-2297.38	-2297.92	-2299.73	-2299.43	-2299.09	-2297.83	-2298.03	-2299.3	-2299.32
C2	4	-2395.87	-2395.13	-2395.19	-2395.6	-2395.88	-2395.57	-2395.82	-2395.52	-2395.16	-2394.97	-2407.17	-2394.46	-2394.38	-2395.62	-2395.36	-2395.15	-2396.02	-2395.83	-2395.84	-2397.8	-2395.52	-2394.91	-2395.43	-2394.99	-2395.17	-2393.12	-2393.89	-2395.58	-2395.28	-2394.99	-2393.7	-2393.93	-2395.19	-2395.2
	6	-2395.9	-2395.16	-2395.25	-2395.64	-2395.91	-2395.61	-2395.85	-2395.57	-2395.22	-2395.05	-2407.2	-2394.48	-2394.42	-2395.65	-2395.39	-2395.22	-2396.03	-2395.86	-2395.87	-2397.84	-2395.56	-2394.95	-2395.46	-2395.03	-2395.21	-2393.16	-2393.92	-2395.61	-2395.31	-2395.03	-2393.75	-2393.98	-2395.24	-2395.24
C3	4	-1722.59	-1722.05	-1722.04	-1722.36	-1722.65	-1722.62	-1722.55	-1722.43	-1722.13	-1722.1	-1730.23	-1721.54	-1721.62	-1722.55	-1722.21	-1722.03	-1722.65	-1722.57	-1722.57	-1723.85	-1722.29	-1722	-1722.34	-1721.96	-1721.93	-1720.76	-1721.11	-1722.35	-1722.12	-1721.78	-1720.93	-1721.08	-1721.97	-1721.98
	6	-1722.64	-1722.1	-1722.12	-1722.43	-1722.71	-1722.69	-1722.61	-1722.5	-1722.22	-1722.2	-1730.29	-1721.59	-1721.69	-1722.61	-1722.26	-1722.13	-1722.69	-1722.62	-1722.62	-1723.91	-1722.35	-1722.06	-1722.4	-1722.02	-1721.98	-1720.82	-1721.16	-1722.41	-1722.18	-1721.85	-1721.01	-1721.15	-1722.03	-1722.04
C4	3	-1722.15	-1721.74	-1721.81	-1721.96	-1722.26	-1722.13	-1722.1	-1721.95	-1721.8	-1721.73	-1728.18	-1721.36	-1721.38	-1722.32	-1722	-1721.66	-1722.17	-1722.09	-1722.09	-1723.28	-1722.03	-1721.66	-1721.98	-1721.62	-1721.69	-1720.6	-1721.08	-1722.06	-1721.84	-1721.65	-1720.98	-1721.12	-1721.83	-1721.83
	5	-1722.2	-1721.79	-1721.87	-1722.01	-1722.31	-1722.2	-1722.16	-1722.01	-1721.87	-1721.82	-1728.24	-1721.4	-1721.43	-1722.38	-1722.05	-1721.74	-1722.2	-1722.14	-1722.13	-1723.33	-1722.08	-1721.71	-1722.03	-1721.67	-1721.74	-1720.66	-1721.12	-1722.09	-1721.89	-1721.71	-1721.05	-1721.19	-1721.89	-1721.89

## Sheet: Delta(DK) DFT
	method	nrel B3LYP-D3(BJ)	rel B3LYP-D3(BJ)
	basis	cc-pVTZ	cc-pVTZ-DK
complex	spinstate
A1	2	-2260.19	-2269.58
	6	-2260.19	-2269.58
A2	1	-2669.32	-2678.88
	5	-2669.32	-2678.87
A3	1	-2765.63	-2775.28
	5	-2765.63	-2775.27
A4	1	-2067.6	-2076.88
	5	-2067.6	-2076.88
A5	1	-2660.65	-2670.2
	5	-2660.66	-2670.2
A6	1	-2345.62	-2355.01
	5	-2345.62	-2355
A7	2	-2410.58	-2421.51
	4	-2410.58	-2421.51
A8	1	-2244.13	-2256.7
	3	-2244.13	-2256.7
A9	2	-1538.31	-1546
	6	-1538.32	-1546
B1	2	-1821.03	-1830.22
	4	-1820.94	-1830.14
B2	1	-1820.71	-1829.9
	3	-1820.6	-1829.79
B3	1	-1953.85	-1964.6
	3	-1953.78	-1964.53
B4	1	-2419.05	-2430.08
	3	-2419.01	-2430.03
C1	4	-2299.97	-2309.43
	6	-2300	-2309.46
C2	4	-2395.73	-2405.37
	6	-2395.76	-2405.41
C3	4	-1722.53	-1730.34
	6	-1722.59	-1730.39
C4	3	-1722.1	-1731.33
	5	-1722.14	-1731.37

## Sheet: DFT <S^2>
	method	B3LYP-D3(BJ)	B3LYP*-D3(BJ)	M06-D3	M06L-D3	OLYP-D3(BJ)	OPBE-D3(BJ)	S12g	S12h	MVS	MVSh	SSB-D	PBE-D3(BJ)	PBE0-D3(BJ)	B97-D3	MN15	MN15L	TPSS-D3(BJ)	TPSSh-D3(BJ)	TPSSh-D4	PW6B95-D3(BJ)	CAM-B3LYP-D3(BJ)	LC-$\omega$PBE-D3(BJ)	$\omega$B97X-D	$\omega$B97X-V	$\omega$B97M-V	LH14t-calPBE-D3	LH20t-D4	SCAN-D3(BJ)	r2SCAN-D3(BJ)	B2PLYP-D3(BJ)	DSD-PBEP86-D3(BJ)	DSD-PBEB95-D3(BJ)	PWPB95-D3(BJ)	PWPB95-D4	B3LYP-D3(BJ)
	basis	def2-QZVPP	def2-QZVPP	def2-QZVPP	def2-QZVPP	def2-QZVPP	def2-QZVPP	def2-QZVPP	def2-QZVPP	def2-QZVPP	def2-QZVPP	def2-QZVPP	def2-QZVPP	def2-QZVPP	def2-QZVPP	def2-QZVPP	def2-QZVPP	def2-QZVPP	def2-QZVPP	def2-QZVPP	def2-QZVPP	def2-QZVPP	def2-QZVPP	def2-QZVPP	def2-QZVPP	def2-QZVPP	def2-QZVPP	def2-QZVPP	def2-QZVPP	def2-QZVPP	def2-QZVPP	def2-QZVPP	def2-QZVPP	def2-QZVPP	def2-QZVPP	T	T-DK
complex	spinstate
A1	2	0.7817	0.7735	0.822085	0.763479	0.7648	0.7677	0.762224	0.779788	0.76591	0.777285	0.767098	0.765815	0.81065	0.7663	1.033	0.7868	0.792614	0.816536	0.816536	0.7808	0.783279	0.7833	0.778577	0.77112	0.773101	0.786385	0.763154	0.862035	0.828967	0.886667	1.00105	0.906361	0.835271	0.835271	0.7803	0.7796
	6	8.7608	8.7603	8.76342	8.76238	8.7593	8.7592	8.7578	8.76013	8.75889	8.76013	8.75913	8.75806	8.76066	8.7604	8.7591	8.7624	8.75858	8.75981	8.75981	8.7612	8.7597	8.7571	8.76017	8.75862	8.75882	8.75971	8.75922	8.76137	8.76093	8.76159	8.76044	8.76066	8.76124	8.76124	8.7609	8.7605
A2	1	0	0	0	0	0	0	0	0	0	0	0	0	0	0	0	0	0	0	0	0	0	0	0	0	0	0	0	0	0	0	0	0	0	0	0	0
	5	6.0077	6.0078	6.02418	6.01731	6.0119	6.0131	6.01118	6.00917	6.01783	6.01437	6.01273		6.00843	6.0131	6.0112	6.0519	6.00668	6.0069	6.0069	6.0076	6.007	6.0056	6.00766	6.007	6.00849	6.0064	6.00757	6.01024	6.01049	6.00866	6.00935	6.00926	6.00848	6.00848	6.0077	6.0079
A3	1	0	0	0	0	0	0	0	0	0	0	0	0	0	0	0	0	0	0	0	0	0	0	0	0	0	0	0	0	0	0	0	0	0	0	0	0
	5	6.0075	6.0076	6.0229	6.01685	6.0114	6.0125	6.01083	6.00894	6.0173	6.01404	6.01235	6.00815	6.00819	6.0127	6.0109	6.0497	6.00641	6.00664	6.00664	6.0074	6.00686	6.0054	6.00757	6.00687	6.00833	6.00621	6.00738	6.00995	6.01018	6.0085	6.00919	6.00909	6.00829	6.00829	6.0075	6.0077
A4	1	0	0	0	0	0	0	0	0	0	0	0	0	0	0	0	0	0	0	0	0	0	0	0	0	0	0	0	0	0	0	0	0	0	0	0	0
	5	6.0066	6.0067	6.01665	6.01528	6.0098	6.0108	6.0095	6.00787	6.01322	6.01084	6.01064	6.00747	6.00727	6.0107	6.0087	6.0389	6.00589	6.00601	6.00601	6.0063	6.00601	6.0047	6.00652	6.0059	6.00695	6.00568	6.00636	6.00778	6.00857	6.00751	6.00809	6.00788	6.00716	6.00716	6.0066	6.0067
A5	1	0	0	0	0	0	0	0	0	0	0	0	0	0	0	0	0	0	0	0	0	0	0	0	0	0	0	0	0	0	0	0	0	0	0	0	0
	5	6.0195	6.0233	6.04624	6.0826	6.0627	6.0662	6.06188	6.02144	6.10271	6.03787	6.06315		6.01899	6.064	6.0162	6.1304	6.0294	6.02129	6.02129	6.016	6.01289	6.0095	6.01404	6.01164	6.01304	6.015		6.05826	6.04829	6.01311	6.0139	6.01321	6.01328	6.01328	6.0192	6.0211
A6	1	0	0	0	0	0	0	0	0	0	0	0	0	0	0	0	0	0	0	0	0	0	0	0	0	0	0	0	0	0	0	0	0	0	0	0	0
	5	6.1036	6.1398	6.27094	6.36037	6.2869	6.3064	6.28777	6.11708	6.40931	6.29088	6.29766	6.23676	6.09675	6.2855	6.0388	6.3998	6.18943	6.1421	6.1421	6.0637	6.04689	6.0325	6.06263	6.03965	6.03764	6.08325	6.08047	6.39614	6.29069	6.02621	6.022	6.02243	6.02842	6.02842	6.1064	6.131
A7	2	0.7597	0.7617	0.769624	0.780413	0.7854	0.7894	0.783654	0.761017	0.80292	0.76579	0.788576	0.769674	0.759729	0.7895	0.7608	0.8292	0.763993	0.761783	0.761783	0.7577	0.756537	0.7556	0.756895	0.755745	0.756354	0.759443	0.758444	0.781966	0.769967	0.755314	0.761517	0.755154	0.755325	0.755325	0.7596	0.76
	4	3.7642	3.7672	3.78472	3.80638	3.8067	3.8109	3.80951	3.76637	3.84383	3.77575	3.8081	3.7866	3.76369	3.8094	3.7648	3.8676	3.76909	3.76359	3.76359	3.7617	3.76017	3.758	3.76139	3.75961	3.76007	3.76056	3.76282	3.76975	3.7792	3.75999	3.7615	3.76019	3.75993	3.75993	3.7641	3.7652
A9	2	0.7591	0.7591	0.781305	0.768528	0.7652	0.7683	0.761474	0.760796	0.775805	0.771093	0.763741	0.758779	0.760713	0.7702	0.77	0.8069	0.757958	0.758834	0.758834	0.7583	0.758036	0.7574	0.75704	0.757223	0.758741	0.760581	0.757704	0.760093	0.762486	0.758535	0.758711	0.757854	0.758514	0.758514	0.759	0.7587
	6	8.7554	8.7552	8.75815	8.7631	8.7564	8.7607	8.75522	8.75579	8.75508	8.75524	8.75578	8.75691	8.7569	8.7551	8.7565	8.764	8.75777	8.75751	8.75751	8.7552	8.7545	8.7543	8.75383	8.75356	8.75364	8.75621	8.75415	8.75871	8.75751	8.75618	8.7573	8.75622	8.75601	8.75601	8.7551	8.7553
B1	2	0.7611	0.7606	0.771983	0.766955	0.7643	0.7655	0.761349	0.763051	0.771123	0.767784	0.764336	0.758989	0.763261	0.767	0.7693	0.7899	0.75889	0.760752	0.760752	0.7616	0.760375	0.7597	0.759928	0.759588	0.76045	0.762288	0.760973	0.76333	0.76357	0.763958	0.767515	0.765598	0.764253	0.764253	0.7609	0.7608
	4	3.7846	3.783	3.79894	3.81336	3.7913	3.7943	3.7851	3.78997	3.81029	3.81326	3.79439	3.77888	3.79078	3.7966	3.7666	3.8465	3.78077	3.78589	3.78589	3.7864	3.78089	3.7752	3.7806	3.77799	3.78418	3.78594	3.7817	3.79526	3.79835	3.79526	3.80341	3.79925	3.7952	3.7952	3.784	3.7837
B2	1	0	0	0	0	0	0	0	0	0	0	0	0	0	0	0	0	0	0	0	0	0	0	0	0	0	0	0	0	0	0	0	0	0	0	0	0
	3	2.0317	2.03	2.05068	2.05783	2.0342	2.0364	2.02841	2.03936	2.05847	2.06222	2.0374	2.02234	2.03751	2.0401	2.0141	2.0854	2.02352	2.0296	2.0296	2.032	2.02723	2.0203	2.02852	2.02405	2.02684	2.02973	2.02916	2.03779	2.04183	2.03683	2.03865	2.03694	2.03634	2.03634	2.0309	2.0314
B3	1	0	0	0	0	0	0	0	0	0	0	0	0	0	0	0	0	0	0	0	0	0	0	0	0	0	0	0	0	0	0	0	0	0	0	0	0
	3	2.025	2.0223	2.01978	2.03564	2.0228	2.0248	2.02008	2.03012	2.04162	2.05291	2.02717	2.01777	2.03193	2.0261	2.0024	2.0544	2.02365	2.02927	2.02927	2.028	2.02275	2.0169	2.02103	2.0194	2.02629	2.02551	2.02036	2.03734	2.0405	2.04069	2.04531	2.04169	2.03982	2.03982	2.0249	2.0236
B4	1	0	0	0	0	0	0	0	0	0	0	0	0	0	0	0	0	0	0	0	0	0	0	0	0	0	0	0	0	0	0	0	0	0	0	0	0
	3	2.0323	2.03	2.02344	2.05148	2.0376	2.0422	2.03433	2.03868	2.06402	2.06212	2.04508	2.02863	2.04271	2.0424	2.0033	2.0778	2.0364	2.04458	2.04458	2.0333	2.02658	2.0208	2.0259	2.02167	2.02778	2.03487	2.02386	2.06323	2.06642	2.03954	2.10545	2.03605	2.03645	2.03645	2.032	2.0301
C1	4	3.8371	3.8336	3.87055	3.90797	3.8764	3.8987	3.85797	3.86185	3.94643	3.93744	3.89375	3.8351	3.86219	3.8984	3.7838	4.0106	3.83744	3.85094	3.85094	3.8428	3.81647	3.8045	3.81376	3.80442	3.81793	3.85709	3.82095	3.85198	3.88898	3.8151	3.79698	3.79881	3.82711	3.82711	3.8372	3.8297
	6	8.7573	8.757	8.75935	8.75911	8.7567	8.7567	8.75581	8.75693	8.75613	8.7568	8.75678	8.75578	8.75713	8.7574	8.7556	8.7589	8.75587	8.75648	8.75648	8.7574	8.75637	8.7543	8.75673	8.75566	8.75597	8.75638	8.75604	8.75746	8.75741	8.75786	8.75702	8.75724	8.75753	8.75753	8.7574	8.7571
C2	4	3.8319	3.8291	3.85613	3.89108	3.8601	3.8765	3.84297	3.85166	3.91196	3.90941	3.87465	3.82683	3.8522	3.8811	3.7797	3.9704	3.83534	3.84648	3.84648	3.8348	3.81108	3.799	3.80815	3.79929	3.81206	3.84661	3.81137	3.85157	3.88059	3.81215	3.79653	3.79739	3.82154	3.82154	3.8314	3.8243
	6	8.7559	8.7555	8.75796	8.75755	8.7551	8.7552	8.75447	8.75579	8.75492	8.75588	8.75533	8.75431	8.75589	8.7556	8.7545	8.7579	8.75434	8.75498	8.75498	8.7561	8.75531	8.7535	8.7557	8.75485	8.75514	8.75508	8.75491	8.75594	8.75582	8.75728	8.75674	8.75689	8.75684	8.75684	8.7559	8.7557
C3	4	3.7648	3.7667	3.77297	3.78586	3.7865	3.7952	3.99303	4.2909	4.08399	4.31221	4.08133	3.77718	3.76647	3.7938	3.7587	3.8174	3.77545	3.77089	3.77089	3.7625	3.76083	3.7604	3.76052	3.7592	3.76135	3.76957	3.761	3.77335	3.78129	4.46133	4.53977	4.46984	4.39171	4.39171	3.7648	3.7643
	6	8.7533	8.7533	8.75709	8.75873	8.7556	8.7601	8.75445	8.75365	8.75422	8.75357	8.75489	8.75563	8.75447	8.7554	8.7551	8.7633	8.75533	8.75483	8.75483	8.753	8.75255	8.7529	8.75225	8.75196	8.75215	8.75416	8.75219	8.75621	8.75567	8.75308	8.7537	8.75306	8.7531	8.7531	8.7532	8.7533

## Sheet: BS A8
method	basis	e_bs	s2_bs	e_c	s2_c	correction
B3LYP-D3(BJ)	def2-QZVPP	-2244.2	0.2734	-2244.18	2.0097	-1.15939
B3LYP*-D3(BJ)	def2-QZVPP	-2243.54	0.1711	-2243.52	2.0092	-0.864298
M06-D3	def2-QZVPP	-2243.51	0.0526687	-2243.5	2.01451	-0.266816
M06L-D3	def2-QZVPP	-2243.95	0.109596	-2243.94	2.01719	-0.516768
OLYP-D3(BJ)	def2-QZVPP	-2244.38	0	-2244.36	2.0115	0
OPBE-D3(BJ)	def2-QZVPP	-2244.36	0	-2244.34	2.0118	0
S12g	def2-QZVPP	-2244.25	7e-06	-2244.23	2.01098	-3.91567e-05
S12h	def2-QZVPP	-2244	0.367393	-2244	2.01129	-0.683369
MVS	def2-QZVPP	-2243.67	0.011014	-2243.66	2.02228	-0.0327731
MVSh	def2-QZVPP	-2243.57	0.464617	-2243.58	2.01582	0.803047
SSB-D	def2-QZVPP	-2254.05	0.000369	-2254.03	2.01349	-0.00161647
PBE-D3(BJ)	def2-QZVPP	-2242.95	0.00031795	-2242.93	2.00802	-0.00209377
PBE0-D3(BJ)	def2-QZVPP	-2242.99	0.428069	-2242.98	2.01069	-1.13061
B97-D3	def2-QZVPP	-2244.28	0	-2244.26	2.0127	0
MN15	def2-QZVPP	-2243.83	0	-2243.81	2.0102	0
MN15L	def2-QZVPP	-2243.65	0	-2243.63	2.0342	0
TPSS-D3(BJ)	def2-QZVPP	-2244.31	0.0421242	-2244.29	2.00805	-0.255044
TPSSh-D3(BJ)	def2-QZVPP	-2244.19	0.240942	-2244.18	2.00913	-1.13682
TPSSh-D4	def2-QZVPP	-2244.19	0.240942	-2244.18	2.00913	-1.13682
PW6B95-D3(BJ)	def2-QZVPP	-2245.82	0.3581	-2245.81	2.0098	-1.1261
CAM-B3LYP-D3(BJ)	def2-QZVPP	-2243.81	0.357703	-2243.8	2.00951	-1.28127
LC-$\omega$PBE-D3(BJ)	def2-QZVPP	-2243.43	0.37	-2243.42	2.0088	-1.61081
$\omega$B97X-D	def2-QZVPP	-2243.88	0.35121	-2243.87	2.00991	-1.21232
$\omega$B97X-V	def2-QZVPP	-2243.44	0.330758	-2243.43	2.0093	-1.21151
$\omega$B97M-V	def2-QZVPP	-2243.39	0.247561	-2243.38	2.00985	-0.772162
LH14t-calPBE-D3	def2-QZVPP	-2241.92	0.207464	-2241.91	2.0084	-1.00865
LH20t-D4	def2-QZVPP	-2242.4	0.129294	-2242.39	2.00876	-0.597034
SCAN-D3(BJ)	def2-QZVPP	-2243.93	0.417916	-2243.92	2.01515	-1.95046
r2SCAN-D3(BJ)	def2-QZVPP	-2243.66	0.27484	-2243.65	2.01328	-1.21642
B2PLYP-D3(BJ)	def2-QZVPP	-2243.34	0.680661	-2243.33	2.01279	-4.21412
DSD-PBEP86-D3(BJ)	def2-QZVPP	-2242.29	0.787422	-2242.29	2.01436	-2.16131
DSD-PBEB95-D3(BJ)	def2-QZVPP	-2242.48	0.745409	-2242.47	2.01325	-2.15833
PWPB95-D3(BJ)	def2-QZVPP	-2243.57	0.629345	-2243.56	2.01199	-3.34939
PWPB95-D4	def2-QZVPP	-2243.59	0.629345	-2243.57	2.01199	-3.34939
B3LYP-D3(BJ)	T	-2244.13	0.2711	-2244.12	2.0096	-1.16015
B3LYP-D3(BJ)	T-DK	-2256.7	0.2794	-2256.69	2.0099	-1.17294
symbol	explanation
e_bs	energy of spin-contaminated singlet solution
s2_bs	<S2> of spin-contaminated singlet solution
e_c	energy of the triplet contaminant
s2_c	<S2> of the triplet contaminant
correction	Yamaguchi correction (kcal/mol)

## Sheet: BS C4
method	basis	e_bs	s2_bs	e_c	s2_c	correction
B3LYP-D3(BJ)	def2-QZVPP	-1722.16	2.6028	-1722.2	6.005	4.52667
B3LYP*-D3(BJ)	def2-QZVPP	-1721.75	2.5657	-1721.79	6.005	4.02235
M06-D3	def2-QZVPP	-1721.81	2.28475	-1721.87	6.0122	2.81714
M06L-D3	def2-QZVPP	-1721.96	2.44754	-1722.01	6.01124	3.97485
OLYP-D3(BJ)	def2-QZVPP	-1722.27	2.5098	-1722.31	6.0073	4.52359
OPBE-D3(BJ)	def2-QZVPP	-1722.14	2.6148	-1722.2	6.0077	6.14837
S12g	def2-QZVPP	-1722.11	2.44897	-1722.16	6.00683	3.87074
S12h	def2-QZVPP	-1721.96	2.60261	-1722.01	6.00587	5.97228
MVS	def2-QZVPP	-1721.81	2.50045	-1721.87	6.00971	6.19156
MVSh	def2-QZVPP	-1721.75	2.63732	-1721.82	6.00798	8.57932
SSB-D	def2-QZVPP	-1728.18	2.49313	-1728.24	6.00773	4.81324
PBE-D3(BJ)	def2-QZVPP	-1721.37	2.60385	-1721.4	6.00521	3.95312
PBE0-D3(BJ)	def2-QZVPP	-1721.39	2.73087	-1721.43	6.00524	6.62014
B97-D3	def2-QZVPP	-1722.33	2.4751	-1722.38	6.0077	4.47869
MN15	def2-QZVPP	-1722.01	2.7817	-1722.05	6.006	5.78116
MN15L	def2-QZVPP	-1721.66	2.0189	-1721.74	6.0252	0.224008
TPSS-D3(BJ)	def2-QZVPP	-1722.17	2.717	-1722.2	6.00433	4.08073
TPSSh-D3(BJ)	def2-QZVPP	-1722.1	2.75004	-1722.14	6.00442	5.03148
TPSSh-D4	def2-QZVPP	-1722.1	2.75004	-1722.13	6.00442	5.03148
PW6B95-D3(BJ)	def2-QZVPP	-1723.29	2.5535	-1723.33	6.0048	4.44572
CAM-B3LYP-D3(BJ)	def2-QZVPP	-1722.03	2.61084	-1722.08	6.00466	4.77396
LC-$\omega$PBE-D3(BJ)	def2-QZVPP	-1721.67	2.6709	-1721.71	6.0035	5.20506
$\omega$B97X-D	def2-QZVPP	-1721.99	2.55557	-1722.03	6.00501	4.27904
$\omega$B97X-V	def2-QZVPP	-1721.62	2.52458	-1721.67	6.00456	4.01263
$\omega$B97M-V	def2-QZVPP	-1721.7	2.29872	-1721.74	6.00553	2.22753
LH14t-calPBE-D3	def2-QZVPP	-1720.61	2.65345	-1720.66	6.00399	5.47476
LH20t-D4	def2-QZVPP	-1721.08	2.30956	-1721.12	6.0046	2.19929
SCAN-D3(BJ)	def2-QZVPP	-1722.06	2.8123	-1722.09	6.00526	4.33623
r2SCAN-D3(BJ)	def2-QZVPP	-1721.85	2.76667	-1721.89	6.00616	6.04888
B2PLYP-D3(BJ)	def2-QZVPP	-1721.66	2.77569	-1721.71	6.00593	7.764
DSD-PBEP86-D3(BJ)	def2-QZVPP	-1720.99	2.83365	-1721.05	6.00636	9.24717
DSD-PBEB95-D3(BJ)	def2-QZVPP	-1721.13	2.78855	-1721.19	6.00622	8.3051
PWPB95-D3(BJ)	def2-QZVPP	-1721.84	2.70496	-1721.89	6.00549	6.43414
PWPB95-D4	def2-QZVPP	-1721.84	2.70496	-1721.89	6.00549	6.43414
B3LYP-D3(BJ)	T	-1722.1	2.5911	-1722.14	6.005	4.41343
B3LYP-D3(BJ)	T-DK	-1731.33	2.585	-1731.37	6.0051	4.32946
symbol	explanation
e_bs	energy of spin-contaminated singlet solution
s2_bs	<S2> of spin-contaminated singlet solution
e_c	energy of the triplet contaminant
s2_c	<S2> of the triplet contaminant
correction	Yamaguchi correction (kcal/mol)
